# Supplementary material for: The mechanism of a phosphazene–phosphazane rearrangement
Source: Royal Society of Chemistry journal article supplement (doi:10.1039/c5dt02762d), 2015-09-22
Supplement: c5dt02762d1.pdf [file c5dt02762d1.pdf]

## Supplementary Information

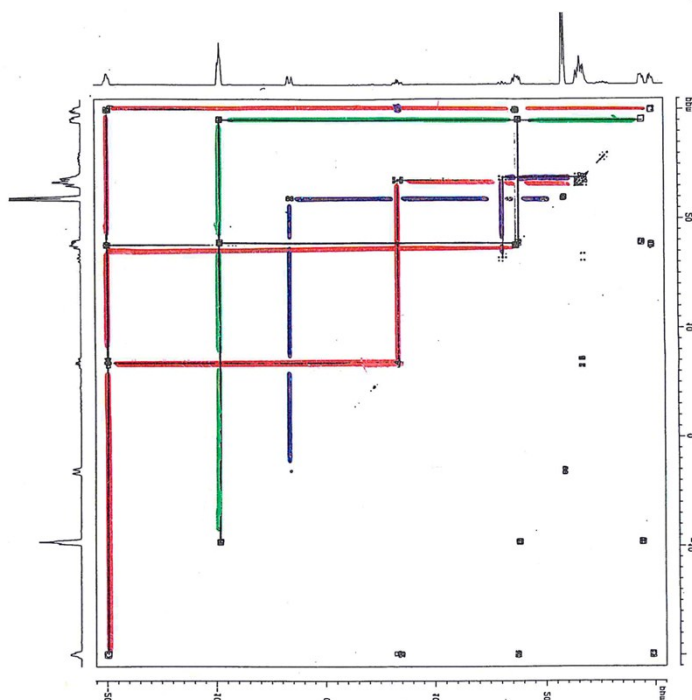

**Figure S1.**  $^{31}\text{P}$  COSY NMR spectrum of the rearranged mixture after thermolysis of **8** at  $111^\circ\text{C}$  for ten hours.

### <sup>31</sup>P NMR Data for wet Samples

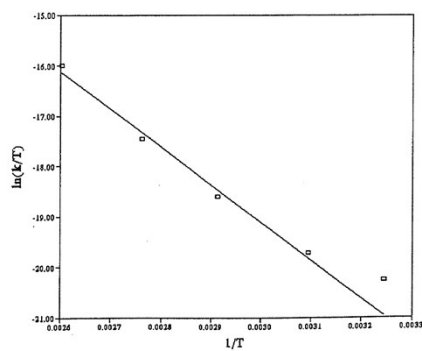

### <sup>31</sup>P NMR Data for Dry Samples

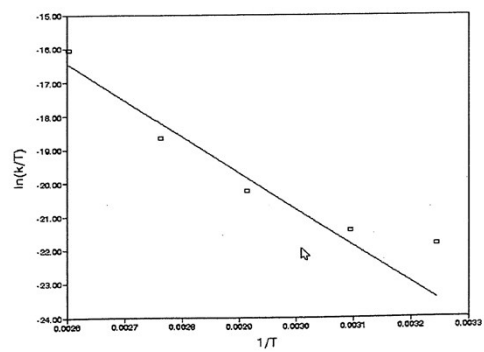

### <sup>1</sup>H NMR Data for Dry Samples

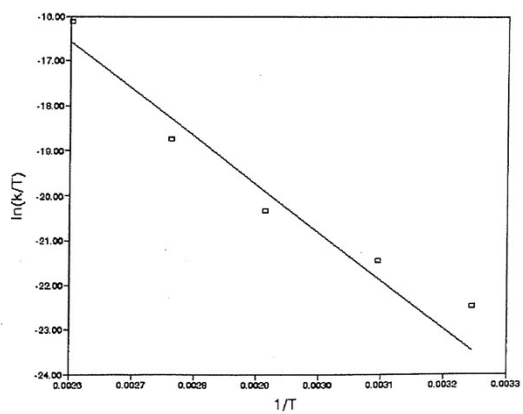

Figure S2. Eyring Plots

**Table S1. NMR Data for Compounds 14 and 15.**

| <u>Data</u>               | <u>14</u>                                              | <u>14</u>                                               |
|---------------------------|--------------------------------------------------------|---------------------------------------------------------|
| <b><sup>1</sup>H NMR</b>  |                                                        |                                                         |
| Vinyl (cis)               | 6.28 (m)                                               | 6.28 (m)                                                |
| Vinyl (trans)             | 5.42 (m)                                               | 5.42 (m)                                                |
| Methyl                    | 1.96 (m)                                               | 1.36 (m)                                                |
| α-CH <sub>2</sub>         | 4.603, 4.599 (AB)                                      | 4.68 (m)                                                |
| β-CH <sub>2</sub>         | 3.7 (m)                                                | 3.7 (m)                                                 |
|                           |                                                        | -19.9 (m)                                               |
| <b><sup>31</sup>P NMR</b> |                                                        |                                                         |
| P(O)O                     | -19.9 (m)                                              |                                                         |
| P(CL)O-                   | -10.7 (m)                                              | 7.0 (d of t), <sup>2</sup> J <sub>pp</sub> = 26.1, 66.8 |
| 4-PCl <sub>2</sub>        | 17.6 (d of d); <sup>2</sup> J <sub>pp</sub> 24.6, 48.0 | 17.5 (d of d) <sup>2</sup> J <sub>pp</sub> = 33.2, 49.6 |
| PCl <sub>2</sub>          | -                                                      | 23.6 (d), <sup>2</sup> J <sub>pp</sub> = 66.8           |
| 6-PCl <sub>2</sub>        | 29.2 (m)                                               | 30.1 (m)                                                |
| <b><sup>31</sup>C NMR</b> |                                                        |                                                         |
| =C(CH <sub>3</sub> )C(O)O | 137.1                                                  | 137.1                                                   |
| H <sub>2</sub> C=         | 127.1                                                  | 127.1                                                   |
| C=O                       | 167.4                                                  | 167.4                                                   |

|                   |      |      |
|-------------------|------|------|
| CH <sub>3</sub>   | 19.1 | 19.1 |
| α=CH <sub>2</sub> | 62.5 | 62.5 |
| β=CH <sub>2</sub> | 46.6 | 46.6 |

**Table S2. <sup>31</sup>P NMR Kinetic Data for Dry Samples and Reaction Order Fit**

| 111 <sup>0</sup> C  |                |                         |                     |                          |                |
|---------------------|----------------|-------------------------|---------------------|--------------------------|----------------|
| Time (hours)        | integration    | First order kinetic fit |                     | Second order kinetic fit |                |
|                     |                | ln(I/I <sub>0</sub> )   | Regression fit      | 1/I - 1/I <sub>0</sub>   | Regression fit |
| 0                   | 1.00           | 0.00                    | 0.08                | 0.00                     | -0.64          |
| 2                   | 0.83           | -0.18                   | -0.22               | 0.20                     | 0.15           |
| 4                   | 0.62           | -0.48                   | -0.52               | 0.62                     | 0.93           |
| 6                   | 0.45           | -0.79                   | -0.81               | 1.20                     | 1.72           |
| 8                   | 0.35           | -1.06                   | -1.11               | 1.88                     | 2.50           |
| 10.2                | 0.23           | -1.47                   | -1.44               | 3.35                     | 3.37           |
| 12.2                | 0.17           | -1.78                   | -1.74               | 4.91                     | 4.15           |
| Regression Output:  |                |                         | Regression Output:  |                          |                |
| Constant            |                | 0.08                    | Constant            |                          | -0.64          |
| Std Err of Y Est    |                | 0.05                    | Std Err of Y Est    |                          | 0.59           |
| R Squared           |                | 0.99                    | R Squared           |                          | 0.91           |
| No. of Observations |                | 7                       | No. of Observations |                          | 7              |
| Degrees of Freedom  |                | 5                       | Degrees of Freedom  |                          | 5              |
| X Coefficient(s)    | -1.49e-01      |                         | X Coefficient(s)    | 3.93e-01                 |                |
| Std Err of Coef.    | 5.07e-03       |                         | Std Err of Coef.    | 5.48e-02                 |                |
| Half-life           | 4.65e+00 hours |                         |                     |                          |                |

90<sup>0</sup> C

| Time (hours)        | integration | First order kinetic fit |                    | Second order kinetic fit |                |
|---------------------|-------------|-------------------------|--------------------|--------------------------|----------------|
|                     |             | $\ln(I/I_0)$            | Regression fit     | $1/I - 1/I_0$            | Regression fit |
| 0                   | 1.00        | 0.00                    | 0.05               | 0.00                     | -0.35          |
| 9.25                | 0.95        | -0.05                   | -0.05              | 0.06                     | -0.14          |
| 35.42               | 0.82        | -0.20                   | -0.32              | 0.22                     | 0.47           |
| 44.5                | 0.64        | -0.45                   | -0.41              | 0.57                     | 0.68           |
| 67.5                | 0.53        | -0.64                   | -0.65              | 0.90                     | 1.22           |
| 87.5                | 0.40        | -0.91                   | -0.86              | 1.49                     | 1.69           |
| 151.5               | 0.22        | -1.51                   | -1.52              | 3.52                     | 3.18           |
| 1126.83*            | 0.00        | -5.82                   | -11.59             | 335.70                   | 25.97          |
| Regression Output:  |             |                         | Regression Output: |                          |                |
| Constant            |             |                         | 0.05               | Constant                 | -0.35          |
| Std Err of Y Est    |             |                         | 0.07               | Std Err of Y Est         | 0.32           |
| R Squared           |             |                         | 0.99               | R Squared                | 0.95           |
| No. of Observations |             |                         | 7                  | No. of Observations      | 7              |
| Degrees of Freedom  |             |                         | 5                  | Degrees of Freedom       | 5              |
|                     |             |                         |                    |                          |                |
| X Coefficient(s)    |             | -1.03e-02               |                    | X Coefficient(s)         | 2.34e-02       |
| Std Err of Coef.    |             | 5.15e-04                |                    | Std Err of Coef.         | 2.48e-03       |
|                     |             |                         |                    |                          |                |
| Half-life           | 6.71e+01    | hours                   |                    |                          |                |

70° C

| Time (hours)        | integration | First order kinetic fit |                    | Second order kinetic fit |                |
|---------------------|-------------|-------------------------|--------------------|--------------------------|----------------|
|                     |             | $\ln(I/I_0)$            | Regression fit     | $1/I - 1/I_0$            | Regression fit |
| 0                   | 1.00        | 0.00                    | 0.01               | 0.00                     | -0.08          |
| 30.25               | 0.97        | -0.03                   | -0.05              | 0.04                     | 0.02           |
| 68.75               | 0.91        | -0.10                   | -0.13              | 0.10                     | 0.15           |
| 100                 | 0.82        | -0.20                   | -0.19              | 0.22                     | 0.25           |
| 155                 | 0.69        | -0.37                   | -0.31              | 0.44                     | 0.43           |
| 290.33              | 0.57        | -0.57                   | -0.58              | 0.77                     | 0.87           |
| 463.33              | 0.40        | -0.92                   | -0.93              | 1.51                     | 1.44           |
| 959.33*             | 0.05        | -3.04                   | -1.93              | 19.83                    | 3.06           |
| Regression Output:  |             |                         | Regression Output: |                          |                |
| Constant            |             |                         | 0.01               | Constant                 | -0.08          |
| Std Err of Y Est    |             |                         | 0.03               | Std Err of Y Est         | 0.07           |
| R Squared           |             |                         | 0.99               | R Squared                | 0.99           |
| No. of Observations |             |                         | 7                  | No. of Observations      | 7              |
| Degrees of Freedom  |             |                         | 5                  | Degrees of Freedom       | 5              |
|                     |             |                         |                    |                          |                |
| X Coefficient(s)    |             | -2.02e-03               |                    | X Coefficient(s)         | 3.27e-03       |
| Std Err of Coef.    |             | 8.02e-05                |                    | Std Err of Coef.         | 1.79e-04       |
|                     |             |                         |                    |                          |                |
| Half-life           | 3.43e+02    | hours                   |                    |                          |                |

50° C

|                     |                | First order kinetic fit |                    | Second order kinetic fit |                |          |
|---------------------|----------------|-------------------------|--------------------|--------------------------|----------------|----------|
| Time (hours)        | integration    | ln(I/Io)                | Regression fit     | 1/I - 1/Io               | Regression fit |          |
| 0*                  | 1.00           | 0.00                    | 0.18               | 0.00                     | -0.28          |          |
| 120                 | 1.05           | 0.05                    | 0.11               | -0.05                    | -0.17          |          |
| 218                 | 1.02           | 0.02                    | 0.05               | -0.02                    | -0.09          |          |
| 475                 | 0.95           | -0.06                   | -0.10              | 0.06                     | 0.14           |          |
| 855.83              | 0.81           | -0.21                   | -0.32              | 0.24                     | 0.48           |          |
| 1695                | 0.43           | -0.85                   | -0.80              | 1.35                     | 1.22           |          |
| Regression Output:  |                |                         | Regression Output: |                          |                |          |
| Constant            |                |                         | 0.18               | Constant                 | -0.28          |          |
| Std Err of Y Est    |                |                         | 0.08               | Std Err of Y Est         | 0.18           |          |
| R Squared           |                |                         | 0.96               | R Squared                | 0.93           |          |
| No. of Observations |                |                         | 5                  | No. of Observations      | 5              |          |
| Degrees of Freedom  |                |                         | 3                  | Degrees of Freedom       | 3              |          |
| X Coefficient(s)    |                | -5.74e-04               |                    | X Coefficient(s)         |                | 8.85e-04 |
| Std Err of Coef.    |                | 6.32e-05                |                    | Std Err of Coef.         |                | 1.44e-04 |
| Half-life           | 1.21e+03 hours |                         |                    |                          |                |          |

35°C

**Table S3. <sup>31</sup>P NMR Kinetic Data and Reaction Order Fit**

| 111°C                    |             |                         |                    |                          |                |
|--------------------------|-------------|-------------------------|--------------------|--------------------------|----------------|
| Time (hours)             | integration | First order kinetic fit |                    | Second order kinetic fit |                |
|                          |             | ln(I/I <sub>0</sub> )   | Regression fit     | 1/I - 1/I <sub>0</sub>   | Regression fit |
| 0*                       | 1.00        | 0.00                    | 0.11               | 0.00                     | -2.82          |
| 3                        | 0.64        | -0.45                   | -0.36              | 0.57                     | -0.67          |
| 6                        | 0.44        | -0.82                   | -0.83              | 1.26                     | 1.48           |
| 9                        | 0.31        | -1.18                   | -1.30              | 2.26                     | 3.64           |
| 12                       | 0.19        | -1.66                   | -1.77              | 4.25                     | 5.79           |
| 15                       | 0.09        | -2.38                   | -2.24              | 9.84                     | 7.94           |
| 18*                      | 0.06        | -2.89                   | -2.71              | 17.01                    | 10.09          |
| Regression Output:       |             |                         | Regression Output: |                          |                |
| Constant                 |             |                         | 0.11               | Constant                 | -2.82          |
| Std Err of Y Est         |             |                         | 0.14               | Std Err of Y Est         | 1.78           |
| R Squared                |             |                         | 0.98               | R Squared                | 0.83           |
| No. of Observations      |             |                         | 5                  | No. of Observations      | 5              |
| Degrees of Freedom       |             |                         | 3                  | Degrees of Freedom       | 3              |
| X Coefficient(s)         |             | -1.57e-01               |                    | X Coefficient(s)         | 7.18e-01       |
| Std Err of Coef.         |             | 1.45e-02                |                    | Std Err of Coef.         | 1.88e-01       |
| Half-life 4.42e+00 hours |             |                         |                    |                          |                |

89°

| Time (hours) | integration | First order kinetic fit |                | Second order kinetic fit |                |
|--------------|-------------|-------------------------|----------------|--------------------------|----------------|
|              |             | ln(I/I <sub>0</sub> )   | Regression fit | 1/I - 1/I <sub>0</sub>   | Regression fit |
| 0*           | 1.00        | 0.00                    | 0.07           | 0.00                     | -0.84          |
| 9            | 0.75        | -0.29                   | -0.23          | 0.33                     | -0.03          |
| 18           | 0.59        | -0.53                   | -0.54          | 0.70                     | 0.78           |
| 27           | 0.46        | -0.79                   | -0.85          | 1.20                     | 1.59           |
| 36           | 0.33        | -1.11                   | -1.16          | 2.03                     | 2.40           |
| 46           | 0.21        | -1.56                   | -1.50          | 3.78                     | 3.30           |
| 57*          | 0.11        | -2.22                   | -1.87          | 8.23                     | 4.29           |

Regression Output:

Constant 0.07  
 Std Err of Y Est 0.07  
 R Squared 0.99  
 No. of Observations 5  
 Degrees of Freedom 3

X Coefficient(s) -3.42e-02  
 Std Err of Coef. 2.29e-03

Half-life 2.03e+01 hours

Regression Output:

Constant -0.84  
 Std Err of Y Est 0.47  
 R Squared 0.91  
 No. of Observations 5  
 Degrees of Freedom 3

X Coefficient(s) 9.01e-02  
 Std Err of Coef. 1.61e-02

70°C

| Time (hours) | integration | First order kinetic fit |                | Second order kinetic fit |                |
|--------------|-------------|-------------------------|----------------|--------------------------|----------------|
|              |             | ln(I/I <sub>0</sub> )   | Regression fit | 1/I - 1/I <sub>0</sub>   | Regression fit |
| 0            | 1.00        | 0.00                    | 0.05           | 0.00                     | -0.20          |
| 336          | 0.63        | -0.46                   | -0.55          | 0.58                     | 0.97           |
| 672          | 0.30        | -1.20                   | -1.16          | 2.33                     | 2.14           |
| 1008*        | 0.11        | -2.22                   | -1.76          | 8.21                     | 3.30           |

Regression Output:

Constant 0.05  
 Std Err of Y Est 0.12  
 R Squared 0.98  
 No. of Observations 3  
 Degrees of Freedom 1

X Coefficient(s) -1.79e-03  
 Std Err of Coef. 2.49e-04

Half-Life 3.87e+02 hours

Regression Output:

Constant -0.20  
 Std Err of Y Est 0.48  
 R Squared 0.92  
 No. of Observations 3  
 Degrees of Freedom 1

X Coefficient(s) 3.47e-03  
 Std Err of Coef. 1.01e-03



50°C

|                     |             | First order kinetic fit |                    | Second order kinetic fit |                |          |
|---------------------|-------------|-------------------------|--------------------|--------------------------|----------------|----------|
| Time (hours)        | integration | ln(I/Io)                | Regression fit     | 1/I - 1/Io               | Regression fit |          |
| 0*                  | 1.00        | 0.00                    | 0.13               | 0.00                     | -0.80          |          |
| 96                  | 0.75        | -0.28                   | -0.18              | 0.33                     | -0.04          |          |
| 216                 | 0.64        | -0.45                   | -0.56              | 0.56                     | 0.90           |          |
| 336                 | 0.42        | -0.87                   | -0.95              | 1.38                     | 1.84           |          |
| 456                 | 0.24        | -1.43                   | -1.34              | 3.19                     | 2.77           |          |
| 588*                | 0.07        | -2.68                   | -1.76              | 13.62                    | 3.81           |          |
| Regression Output:  |             |                         | Regression Output: |                          |                |          |
| Constant            |             | 0.13                    |                    | Constant                 |                | -0.80    |
| Std Err of Y Est    |             | 0.14                    |                    | Std Err of Y Est         |                | 0.56     |
| R Squared           |             | 0.95                    |                    | R Squared                |                | 0.88     |
| No. of Observations |             | 4                       |                    | No. of Observations      |                | 4        |
| Degrees of Freedom  |             | 2                       |                    | Degrees of Freedom       |                | 2        |
| X Coefficient(s)    |             | -3.22e-03               |                    | X Coefficient(s)         |                | 7.83e-03 |
| Std Err of Coef.    |             | 5.32e-04                |                    | Std Err of Coef.         |                | 2.08e-03 |
| Half-Life           |             | 2.15e+02 hours          |                    |                          |                |          |

35°C

|                     |             | First order kinetic fit |                    | Second order kinetic fit |                |          |
|---------------------|-------------|-------------------------|--------------------|--------------------------|----------------|----------|
| Time (hours)        | integration | ln(I/Io)                | Regression fit     | 1/I - 1/Io               | Regression fit |          |
| 0                   | 1.00        | 0.00                    | 0.05               | 0.00                     | -0.20          |          |
| 336                 | 0.63        | -0.46                   | -0.55              | 0.58                     | 0.97           |          |
| 672                 | 0.30        | -1.20                   | -1.16              | 2.33                     | 2.14           |          |
| 1008*               | 0.11        | -2.22                   | -1.76              | 8.21                     | 3.30           |          |
| Regression Output:  |             |                         | Regression Output: |                          |                |          |
| Constant            |             | 0.05                    |                    | Constant                 |                | -0.20    |
| Std Err of Y Est    |             | 0.12                    |                    | Std Err of Y Est         |                | 0.48     |
| R Squared           |             | 0.98                    |                    | R Squared                |                | 0.92     |
| No. of Observations |             | 3                       |                    | No. of Observations      |                | 3        |
| Degrees of Freedom  |             | 1                       |                    | Degrees of Freedom       |                | 1        |
| X Coefficient(s)    |             | -1.79e-03               |                    | X Coefficient(s)         |                | 3.47e-03 |
| Std Err of Coef.    |             | 2.49e-04                |                    | Std Err of Coef.         |                | 1.01e-03 |
| Half-Life           |             | 3.87e+02 hours          |                    |                          |                |          |

<sup>31</sup>P signal from the PCI(OCH<sub>2</sub>CH<sub>2</sub>OC(O)CMe=CH<sub>2</sub>) center followed. \* Data point not included in regression analyses.

**Table S4. <sup>1</sup>H NMR Kinetic Data for Dry Samples and Reaction Order Fit**

111<sup>0</sup> C

|                     |             | First order kinetic fit |                    | Second order kinetic fit |                |
|---------------------|-------------|-------------------------|--------------------|--------------------------|----------------|
| Time (hours)        | integration | ln(I/Io)                | Regression fit     | 1/I - 1/Io               | Regression fit |
| 0                   | 1.00        | 0.00                    | -0.02              | 0.00                     | -0.39          |
| 2                   | 0.74        | -0.30                   | -0.30              | 0.35                     | 0.31           |
| 4                   | 0.57        | -0.57                   | -0.57              | 0.77                     | 1.01           |
| 6                   | 0.41        | -0.89                   | -0.85              | 1.44                     | 1.71           |
| 8                   | 0.32        | -1.14                   | -1.12              | 2.13                     | 2.41           |
| 10.2                | 0.25        | -1.38                   | -1.42              | 2.99                     | 3.18           |
| 12.2                | 0.18        | -1.69                   | -1.70              | 4.43                     | 3.88           |
| Regression Output:  |             |                         | Regression Output: |                          |                |
| Constant            |             |                         | -0.02              | Constant                 | -0.39          |
| Std Err of Y Est    |             |                         | 0.03               | Std Err of Y Est         | 0.37           |
| R Squared           |             |                         | 1.00               | R Squared                | 0.95           |
| No. of Observations |             |                         | 7                  | No. of Observations      | 7              |
| Degrees of Freedom  |             |                         | 5                  | Degrees of Freedom       | 5              |
| X Coefficient(s)    |             | -1.37e-01               |                    | X Coefficient(s)         |                |
| Std Err of Coef.    |             | 2.74e-03                |                    | Std Err of Coef.         |                |
|                     |             |                         |                    | 3.50e-01                 |                |
|                     |             |                         |                    | 3.48e-02                 |                |
| Half-life           | 5.06e+00    | hours                   |                    |                          |                |

90<sup>0</sup> C

|                     |                | First order kinetic fit |                    | Second order kinetic fit |                |
|---------------------|----------------|-------------------------|--------------------|--------------------------|----------------|
| Time (hours)        | integration    | ln(I/Io)                | Regression fit     | 1/I - 1/Io               | Regression fit |
| 0                   | 1.00           | 0.00                    | 0.04               | 0.00                     | -0.26          |
| 9.25                | 0.96           | -0.04                   | -0.05              | 0.04                     | -0.08          |
| 35.42               | 0.84           | -0.18                   | -0.30              | 0.20                     | 0.42           |
| 44.5                | 0.66           | -0.41                   | -0.38              | 0.51                     | 0.60           |
| 67.5                | 0.54           | -0.61                   | -0.60              | 0.84                     | 1.05           |
| 87.5                | 0.42           | -0.86                   | -0.78              | 1.37                     | 1.43           |
| 151.5               | 0.26           | -1.36                   | -1.39              | 2.88                     | 2.67           |
| 1126.83             | 0.02           | -3.76                   | -10.55             | 41.75                    | 21.59          |
| Regression Output:  |                |                         | Regression Output: |                          |                |
| Constant            |                |                         | 0.04               | Constant                 | -0.26          |
| Std Err of Y Est    |                |                         | 0.07               | Std Err of Y Est         | 0.22           |
| R Squared           |                |                         | 0.98               | R Squared                | 0.96           |
| No. of Observations |                |                         | 7                  | No. of Observations      | 7              |
| Degrees of Freedom  |                |                         | 5                  | Degrees of Freedom       | 5              |
| X Coefficient(s)    |                | -9.40e-03               |                    | X Coefficient(s)         |                |
| Std Err of Coef.    |                | 5.33e-04                |                    | Std Err of Coef.         |                |
|                     |                |                         |                    | 1.94e-02                 |                |
|                     |                |                         |                    | 1.70e-03                 |                |
| Half-life           | 7.38e+01 hours |                         |                    |                          |                |

70° C

| Time (hours)        | integration | First order kinetic fit |                    | Second order kinetic fit |                |
|---------------------|-------------|-------------------------|--------------------|--------------------------|----------------|
|                     |             | ln(I/Io)                | Regression fit     | 1/I - 1/Io               | Regression fit |
| 0                   | 1.00        | 0.00                    | -0.02              | 0.00                     | -0.04          |
| 30.25               | 0.93        | -0.07                   | -0.07              | 0.07                     | 0.05           |
| 68.75               | 0.86        | -0.16                   | -0.14              | 0.17                     | 0.16           |
| 100                 | 0.84        | -0.18                   | -0.20              | 0.19                     | 0.25           |
| 155                 | 0.70        | -0.35                   | -0.30              | 0.43                     | 0.41           |
| 290.33              | 0.59        | -0.53                   | -0.55              | 0.69                     | 0.81           |
| 463.33              | 0.42        | -0.87                   | -0.87              | 1.39                     | 1.32           |
| 959.33*             | 0.06        | -2.79                   | -1.78              | 15.36                    | 2.77           |
| Regression Output:  |             |                         | Regression Output: |                          |                |
| Constant            |             |                         | -0.02              | Constant                 | -0.04          |
| Std Err of Y Est    |             |                         | 0.03               | Std Err of Y Est         | 0.07           |
| R Squared           |             |                         | 0.99               | R Squared                | 0.98           |
| No. of Observations |             |                         | 7                  | No. of Observations      | 7              |
| Degrees of Freedom  |             |                         | 5                  | Degrees of Freedom       | 5              |
| X Coefficient(s)    |             | -1.84e-03               |                    | X Coefficient(s)         | 2.93e-03       |
| Std Err of Coef.    |             | 7.30e-05                |                    | Std Err of Coef.         | 1.74e-04       |
| Half-life           | 3.76e+02    | hours                   |                    |                          |                |

50° C

| Time (hours)        | integration | First order kinetic fit |                    | Second order kinetic fit |                |
|---------------------|-------------|-------------------------|--------------------|--------------------------|----------------|
|                     |             | ln(I/Io)                | Regression fit     | 1/I - 1/Io               | Regression fit |
| 0                   | 1.00        | 0.00                    | -0.02              | 0.00                     | -0.04          |
| 30.25               | 0.93        | -0.07                   | -0.07              | 0.07                     | 0.05           |
| 68.75               | 0.86        | -0.16                   | -0.14              | 0.17                     | 0.16           |
| 100                 | 0.84        | -0.18                   | -0.20              | 0.19                     | 0.25           |
| 155                 | 0.70        | -0.35                   | -0.30              | 0.43                     | 0.41           |
| 290.33              | 0.59        | -0.53                   | -0.55              | 0.69                     | 0.81           |
| 463.33              | 0.42        | -0.87                   | -0.87              | 1.39                     | 1.32           |
| 959.33*             | 0.06        | -2.79                   | -1.78              | 15.36                    | 2.77           |
| Regression Output:  |             |                         | Regression Output: |                          |                |
| Constant            |             |                         | -0.02              | Constant                 | -0.04          |
| Std Err of Y Est    |             |                         | 0.03               | Std Err of Y Est         | 0.07           |
| R Squared           |             |                         | 0.99               | R Squared                | 0.98           |
| No. of Observations |             |                         | 7                  | No. of Observations      | 7              |
| Degrees of Freedom  |             |                         | 5                  | Degrees of Freedom       | 5              |
| X Coefficient(s)    |             | -1.84e-03               |                    | X Coefficient(s)         | 2.93e-03       |
| Std Err of Coef.    |             | 7.30e-05                |                    | Std Err of Coef.         | 1.74e-04       |
| Half-life           | 3.76e+02    | hours                   |                    |                          |                |

**Table S5. Eyring Plot of Kinetic Data and Calculations**

**<sup>31</sup>P NMR Data**

| Temp(C) | Temp(K) | 1/T      | Rate Const.(hours) | Rate Const.(seconds) | ln(k/T) | Reg. fit | Calc. S |
|---------|---------|----------|--------------------|----------------------|---------|----------|---------|
| 111     | 384     | 2.60e-03 | 1.57e-01           | 4.35e-05             | -16.0   | -16.3    | -187    |
| 89      | 362     | 2.76e-03 | 3.42e-02           | 9.50e-06             | -17.5   | -17.3    | -190    |
| 70      | 343     | 2.91e-03 | 1.03e-02           | 2.86e-06             | -18.6   | -18.3    | -191    |
| 50      | 323     | 3.09e-03 | 3.22e-03           | 8.95e-07             | -19.7   | -19.5    | -191    |
| 35*     | 308     | 3.25e-03 | 1.80e-03           | 5.00e-07             | -20.2   | -20.5    | -187    |

Regression Output:

|                     |      |
|---------------------|------|
| Constant            | 3.46 |
| Std Err of Y Est    | 0.19 |
| R Squared           | 0.99 |
| No. of Observations | 4    |
| Degrees of Freedom  | 2    |

|                  |       |
|------------------|-------|
| X Coefficient(s) | -7525 |
| Std Err of Coef. | 514   |

|                     |              |
|---------------------|--------------|
| $\Delta H^\ddagger$ | 62.6 KJ/mol  |
| $\Delta S^\ddagger$ | -169 J/mol K |

**<sup>31</sup>P NMR Data for Dry Samples**

| Temp(C) | Temp(K) | 1/T      | Rate Const.(hours) | Rate Const.(seconds) | ln(k/T) | Reg. fit | Calc. S |
|---------|---------|----------|--------------------|----------------------|---------|----------|---------|
| 111     | 384     | 2.60e-03 | 1.49e-01           | 4.14e-05             | -16.0   | -16.8    | -139    |
| 89      | 362     | 2.76e-03 | 1.03e-02           | 2.86e-06             | -18.7   | -18.2    | -149    |
| 70      | 343     | 2.91e-03 | 2.02e-03           | 5.61e-07             | -20.2   | -19.6    | -151    |
| 50      | 323     | 3.09e-03 | 5.74e-04           | 1.59e-07             | -21.4   | -21.2    | -147    |
| 35*     | 308     | 3.25e-03 | 3.58e-04           | 9.94e-08             | -21.9   | -22.5    | -140    |

Regression Output:

|                     |       |
|---------------------|-------|
| Constant            | 11.71 |
| Std Err of Y Est    | 0.59  |
| R Squared           | 0.96  |
| No. of Observations | 4     |
| Degrees of Freedom  | 2     |

|                  |        |
|------------------|--------|
| X Coefficient(s) | -10834 |
| Std Err of Coef. | 1614   |

|                     |              |
|---------------------|--------------|
| $\Delta H^\ddagger$ | 90.1 KJ/mol  |
| $\Delta S^\ddagger$ | -100 J/mol K |

**<sup>1</sup>H NMR Data for Dry Samples**

| Temp(C) | Temp(K) | 1/T      | Rate Const.(hours) | Rate Const.(seconds) | ln(k/T) | Reg. fit | Calc. S |
|---------|---------|----------|--------------------|----------------------|---------|----------|---------|
| 111     | 384     | 2.60e-03 | 1.37e-01           | 3.81e-05             | -16.1   | -16.8    | -126    |
| 89      | 362     | 2.76e-03 | 9.40e-03           | 2.61e-06             | -18.7   | -18.3    | -135    |
| 70      | 343     | 2.91e-03 | 1.84e-03           | 5.11e-07             | -20.3   | -19.7    | -136    |
| 50      | 323     | 3.09e-03 | 5.66e-04           | 1.50e-07             | -21.5   | -21.5    | -131    |
| 35*     | 308     | 3.25e-03 | 1.92e-04           | 5.33e-08             | -22.5   | -22.9    | -127    |

Regression Output:

|                     |       |
|---------------------|-------|
| Constant            | 11.27 |
| Std Err of Y Est    | 0.62  |
| R Squared           | 0.95  |
| No. of Observations | 4     |
| Degrees of Freedom  | 2     |

|                  |        |
|------------------|--------|
| X Coefficient(s) | -10701 |
| Std Err of Coef. | 1692   |

|                     |              |
|---------------------|--------------|
| $\Delta H^\ddagger$ | 89.0 KJ/mol  |
| $\Delta S^\ddagger$ | -104 J/mol K |

- Labeled data not included in analysis
